# Supplementary material for: Classification of Daily Body Weight Gains in Beef Calves Using Decision Trees, Artificial Neural Networks, and Logistic Regression
Source: MDPI journal article supplement (doi:10.3390/ani13121956), 2023-06-11
Supplement: s1 [file s1]

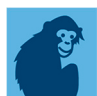

## Supplementary Material

**Table S1.** Quality indicators and Matthews correlation coefficients for the individual models based on the training set (or combined validation and training set).

| Model | Limousin          |      |      |      | Simmental         |                    |                   |                   |
|-------|-------------------|------|------|------|-------------------|--------------------|-------------------|-------------------|
|       | SEN               | SPF  | ACC  | MCC  | SEN               | SPF                | ACC               | MCC               |
| LR    | 0.82              | 0.65 | 0.75 | 0.28 | 0.73 <sup>B</sup> | 0.78 <sup>B</sup>  | 0.76 <sup>b</sup> | 0.51              |
| CART  | 0.81              | 0.74 | 0.78 | 0.47 | 0.59 <sup>A</sup> | 0.83 <sup>B</sup>  | 0.73 <sup>b</sup> | 0.44              |
| CHAID | 0.71 <sup>b</sup> | 0.77 | 0.74 | 0.38 | 0.72 <sup>B</sup> | 0.71 <sup>Aa</sup> | 0.71 <sup>b</sup> | 0.43 <sup>b</sup> |
| RF    | 0.92 <sup>a</sup> | 0.65 | 0.80 | 0.55 | 0.73 <sup>B</sup> | 0.89 <sup>B</sup>  | 0.82 <sup>a</sup> | 0.63 <sup>a</sup> |
| ANN   | 0.84              | 0.79 | 0.82 | 0.52 | 0.72 <sup>B</sup> | 0.77 <sup>b</sup>  | 0.74 <sup>b</sup> | 0.48              |

LR – logistic regression, CART – classification and regression trees, CHAID – chi-square automatic interaction detector, RF – random forest, ANN – artificial neural networks, SEN – sensitivity, SPF – specificity, ACC – accuracy, MCC – Matthews correlation coefficient

**Table S2.** Classification matrices for the individual models based on the training set (or combined validation and training set).

| Limousin |    |    |      |    |       |    |     |    |     |    |
|----------|----|----|------|----|-------|----|-----|----|-----|----|
|          | LR |    | CART |    | CHAID |    | RF  |    | ANN |    |
|          | A  | B  | A    | B  | A     | B  | A   | B  | A   | B  |
| A        | 93 | 37 | 106  | 24 | 88    | 42 | 113 | 17 | 108 | 33 |
| B        | 46 | 59 | 37   | 68 | 31    | 74 | 35  | 70 | 22  | 72 |

  

| Simmental |     |     |      |     |       |     |     |     |     |     |
|-----------|-----|-----|------|-----|-------|-----|-----|-----|-----|-----|
|           | LR  |     | CART |     | CHAID |     | RF  |     | ANN |     |
|           | A   | B   | A    | B   | A     | B   | A   | B   | A   | B   |
| A         | 126 | 47  | 102  | 71  | 124   | 49  | 127 | 46  | 124 | 49  |
| B         | 48  | 174 | 37   | 185 | 64    | 158 | 25  | 197 | 52  | 170 |

LR – logistic regression, CART – classification and regression trees, CHAID – chi-square automatic interaction detector, RF – random forest, ANN – artificial neural networks, A – category A, B – category B

**Table S3.** Classification matrices for the individual models based on the test set.

| Limousin |    |    |      |    |       |    |    |    |     |    |
|----------|----|----|------|----|-------|----|----|----|-----|----|
|          | LR |    | CART |    | CHAID |    | RF |    | ANN |    |
|          | A  | B  | A    | B  | A     | B  | A  | B  | A   | B  |
| A        | 34 | 14 | 35   | 10 | 20    | 10 | 35 | 12 | 30  | 13 |
| B        | 11 | 20 | 10   | 24 | 16    | 33 | 7  | 25 | 11  | 25 |

  

| Simmental |    |    |      |    |       |    |    |    |     |    |
|-----------|----|----|------|----|-------|----|----|----|-----|----|
|           | LR |    | CART |    | CHAID |    | RF |    | ANN |    |
|           | A  | B  | A    | B  | A     | B  | A  | B  | A   | B  |
| A         | 37 | 25 | 39   | 15 | 41    | 29 | 38 | 11 | 43  | 29 |
| B         | 19 | 51 | 17   | 61 | 15    | 47 | 18 | 65 | 13  | 47 |

LR – logistic regression, CART – classification and regression trees, CHAID – chi-square automatic interaction detector, RF – random forest, ANN – artificial neural networks, A – category A, B – category B

**Table S4.** The sums of ranks for the predictors included in the individual models (inverted ranks).

|        | CHAID | RF | LR | ANN | CART | Total sum |
|--------|-------|----|----|-----|------|-----------|
| DDBWG  | 1     | 1  | 1  | 2   | 1    | 104       |
| CDBWG1 | 6     | 2  | 2  | 3   | 2    | 95        |
| CMY1   | 4     | 3  | 4  | 6   | 5    | 88        |
| CG3    | 3     | 16 | 3  | 1   | 3    | 84        |
| CMY2   | 14    | 4  | 6  | 10  | 4    | 72        |
| CBW3   | 5     | 5  | 8  | 16  | 8    | 68        |
| DBW    | 13    | 8  | 9  | 4   | 12   | 64        |
| AFC    | 10    | 7  | 20 | 8   | 6    | 59        |
| CBW2   | 16    | 12 | 11 | 9   | 10   | 52        |
| CS2    | 2     | 18 | 5  | 13  | 20   | 52        |
| WH     | 9     | 9  | 7  | 17  | 18   | 50        |
| CDBWG2 | 12    | 6  | 21 | 11  | 11   | 49        |
| HH     | 17    | 14 | 10 | 5   | 16   | 48        |
| CBW1   | 7     | 11 | 15 | 18  | 15   | 44        |
| GL1    | 15    | 15 | 18 | 7   | 14   | 41        |
| CG1    | 8     | 20 | 13 | 20  | 9    | 40        |
| CG     | 19    | 10 | 14 | 15  | 13   | 39        |
| CS3    | 11    | 21 | 16 | 12  | 21   | 29        |
| CS1    | 20    | 19 | 12 | 14  | 17   | 28        |
| CG2    | 21    | 17 | 19 | 21  | 7    | 25        |
| GL2    | 18    | 13 | 17 | 19  | 19   | 24        |

LR – logistic regression, CART – classification and regression trees, CHAID – chi-square automatic interaction detector, RF – random forest, ANN – artificial neural networks

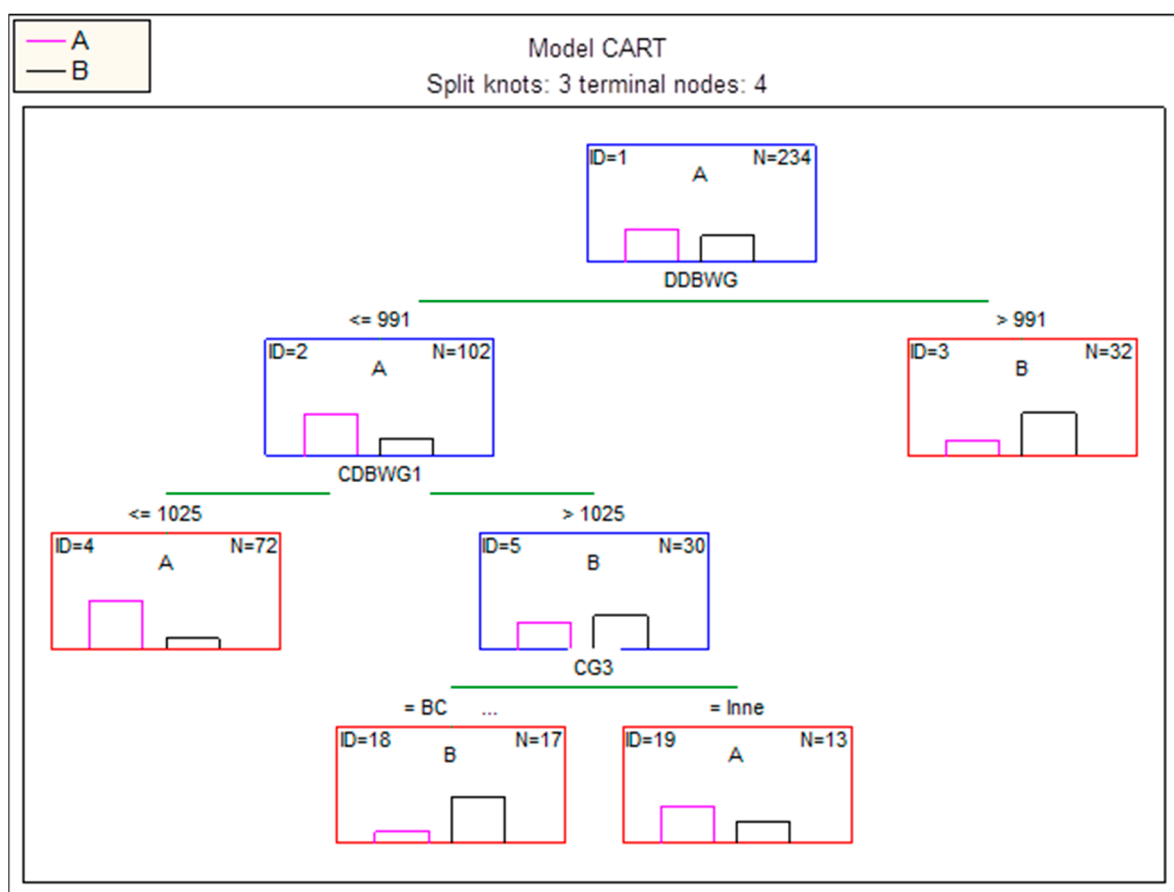

**Figure S1.** – part 1. CART model for the Limousin breed.

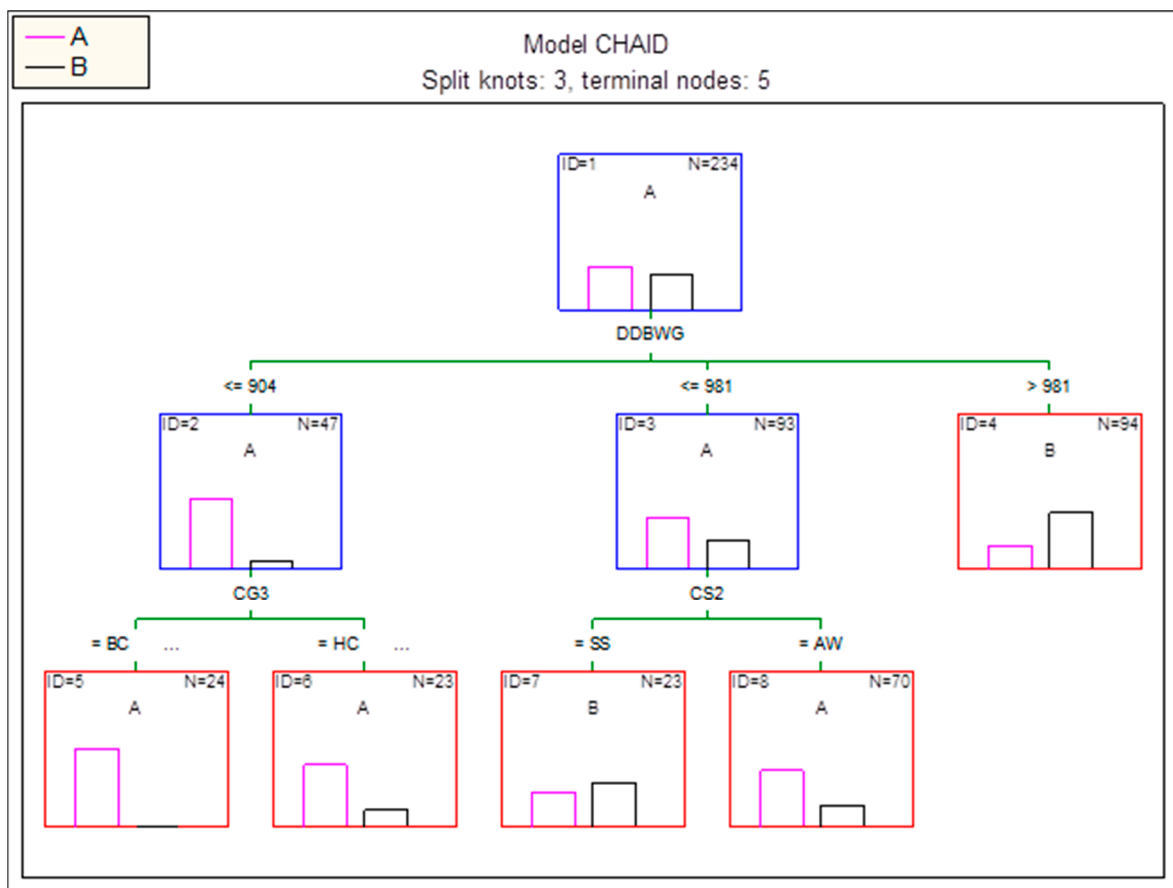

Figure S1. – part 2. CHAID model for the Limousin breed.

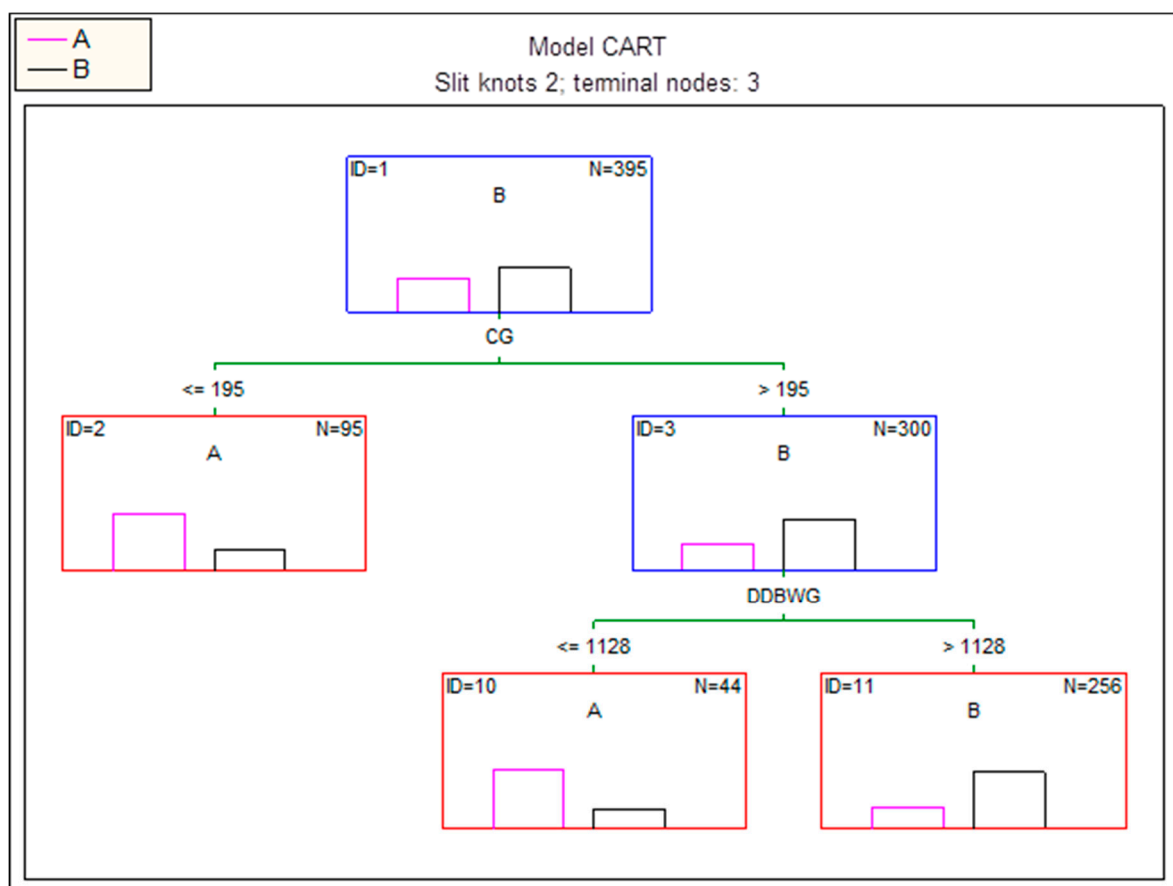

Figure S1. – part 3. CART model for the Simmental breed.

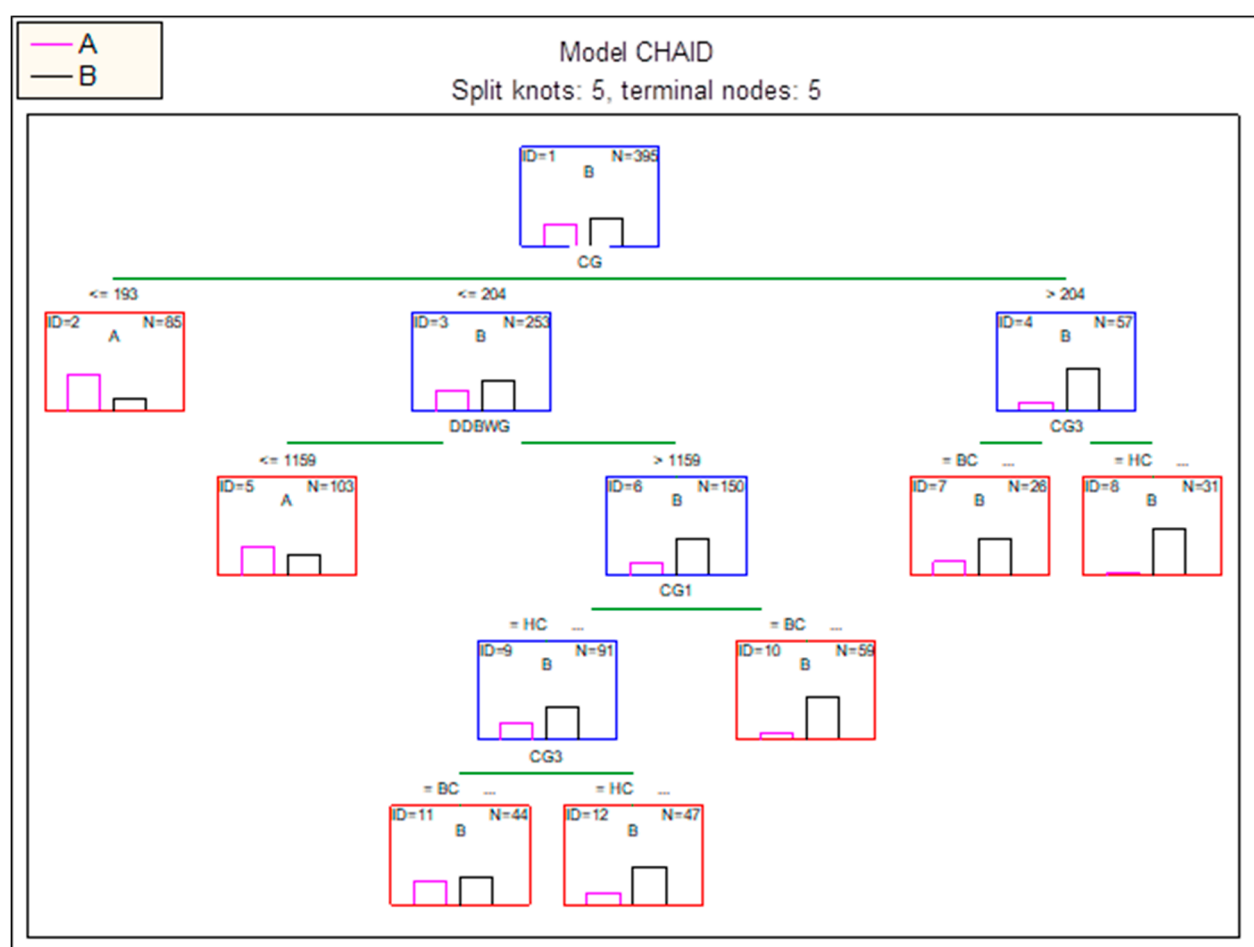

Figure S1. – part 4. CHAID model for the Simmental breed.
